# Supplementary material for: An Investigation on Phenolic and Antioxidant Capacity of Under-utilized Food Legumes Consumed in China
Source: PubMed Central journal article supplement (PMC7231270; doi:10.3390/foods9040438), 2020-04-06
Supplement: foods-09-00438-s001.pdf [file foods-09-00438-s001.pdf]

Supplementary

**Table S1.** Sample ID, Chinese names, English names, scientific names, moisture content, morphology, and sources of 23 legumes.

| Sample ID | Chinese name  | English name        | Scientific name                                | Moisture content | Morphology                                                                            | Source             |
|-----------|---------------|---------------------|------------------------------------------------|------------------|---------------------------------------------------------------------------------------|--------------------|
| 1         | Chixiaodou    | Small adzuki bean   | <i>Vigna umbellata</i>                         | 12.4 %           |    | Commercial product |
| 2         | Chidou        | Adzuki bean         | <i>Vigna angularis</i> (Willd.) Ohwi et Ohashi | 11.1 %           |    | Commercial product |
| 3         | Quedandou     | Pinto bean          | <i>Phaseolus vulgaris</i>                      | 13.2 %           |    | Commercial product |
| 4         | Jinsidou      | Red pinto bean      | <i>Phaseolus vulgaris</i>                      | 10.9 %           |    | Commercial product |
| 5         | Naihuadou     | Milky flower bean   | <i>Phaseolus vulgaris</i>                      | 13.3 %           |  | Commercial product |
| 6         | Yandou        | Stone bean          | <i>Flemingia fluminalis</i> C.B.Clarke         | 11.1 %           |  | Commercial product |
| 7         | Bai huayaodou | Light speckled bean | <i>Phaseolus vulgaris</i>                      | 13.1 %           |  | Commercial product |

|    |               |                         |                                  |        |                                                                                       |                    |
|----|---------------|-------------------------|----------------------------------|--------|---------------------------------------------------------------------------------------|--------------------|
| 8  | Majiangdou    | Spotted cowpea          | <i>Vigna unguiculata</i>         | 11.2 % |    | Commercial product |
| 9  | Hebaodou      | Large zebra bean        | <i>Phaseolus coccineus</i> Linn. | 12.9 % |    | Commercial product |
| 10 | Baibiandou    | White flat bean         | <i>Dolicho lablab</i> L.         | 11.4 % |    | Commercial product |
| 11 | Huayaodou     | Pinto kidney bean       | <i>Phaseolus vulgaris</i>        | 12.6 % |    | Commercial product |
| 12 | Hongyaodou    | Red kidney              | <i>Phaseolus vulgaris</i>        | 11.4 % |    | Commercial product |
| 13 | Baiyundou     | Large white kidney bean | <i>Phaseolus vulgaris</i> Linn.  | 11.6 % |   | Commercial product |
| 14 | Yuan banmadou | Small round pinto bean  | <i>Phaseolus vulgaris</i>        | 10.4 % |  | Commercial product |
| 15 | Banmadou      | Small zebra bean        | <i>Phaseolus coccineus</i> Linn. | 9.9 %  |  | Commercial product |

|    |             |                   |                                                  |        |                                                                                       |                    |
|----|-------------|-------------------|--------------------------------------------------|--------|---------------------------------------------------------------------------------------|--------------------|
| 16 | Maodou      | Velvet bean       | <i>Mucuna cochinchinensis</i> (Lour)Tang et Wang | 11.7 % |    | Commercial product |
| 17 | Chandou     | Broad bean        | <i>Vicia faba</i> L.                             | 11.3 % |    | Commercial product |
| 18 | Baiyaodou   | White kidney bean | <i>Phaseolus vulgaris</i>                        | 13.3 % |    | Commercial product |
| 19 | Zhudou      | Green adzuki bean | <i>Vigna umbellata</i>                           | 11.1 % |    | Commercial product |
| 20 | Mei dou     | Black-eyed pea    | <i>Vigna unguiculata</i>                         | 11.8 % |    | Commercial product |
| 21 | Xiaobaidou  | Small white bean  | <i>Phaseolus vulgaris</i> L. f.abla Alef         | 12.0%  |   | Commercial product |
| 22 | Huajiangdou | Mosaic bean       | <i>Vigna unguiculata</i> (Linn.)Walp             | 11.3 % |  | Commercial product |
| 23 | Xiaoheidou  | Small black bean  | <i>Phaseolus vulgaris</i>                        | 10.0 % |  | Commercial product |

---
